# Supplementary material
Source: PubMed Central journal article supplement (PMC4920293)
Supplement: rstb20150236supp1.pdf [file rstb20150236supp1.pdf]

Supplemental Online Information For:

Morphological variation in *Homo erectus* and the origins of  
developmental plasticity

**Susan C. Antón<sup>1\*</sup>, Hannah G. Taboada<sup>1</sup>, Emily R. Middleton<sup>1,2</sup>, Christopher W. Rainwater<sup>1</sup>, Andrea B. Taylor<sup>3</sup>, Trudy Turner<sup>4</sup>, Jean E. Turnquist<sup>5</sup>, Karen J. Weinstein<sup>6</sup>, Scott A. Williams<sup>1</sup>**

<sup>1</sup>Department of Anthropology, New York University, 25 Waverly Place, New York, NY 10003 USA, <sup>2</sup>Department of Department of Pathology and Anatomical Sciences, University of Missouri, M263 Medical Science Building, Columbia, MO 65212 USA,

<sup>3</sup>Department of Orthopaedics and Department of Evolutionary Anthropology, Duke University School of Medicine, Durham, NC 27708 USA,

<sup>4</sup>Department of Anthropology, University of Wisconsin, PO Box 413, Milwaukee, WI USA, and University of the Free State, Bloemfontein, South Africa,

<sup>5</sup>Caribbean Primate Research Center and Department of Anatomy and Neurobiology (Retired), University of Puerto Rico Medical Sciences Campus, San Juan, Puerto Rico USA,

<sup>6</sup>Department of Anthropology and Archaeology, Dickinson College, Carlisle, PA, Y 17013 USA.

**Table 1. Arctic Human Sample.** Sexual dimorphism values (male/female) and means by sex for Alaskan samples. Mean values that do not significantly differ between the living populations and the Point Hope sample (at the 0.05 level with Benjamini-Yekutieli adjustment for multiple comparisons) are indicated by ‘ns’. Within sample differences between male and female means indicated by ***bold and italicized*** values. Kotzebue incorporates individuals from Point Hope. Wainwright is within the Barrow collecting area and both are North of Point Hope. Nunatagmiut is inland from Barrow. Mackenzie, Coronation Gulf and Victoria Island are far east coastal areas. Stature in cm, all other measurements in mm.

|                      | Point Hope                                                    | Kotzebue**                                                 | Wainwright                                                | Barrow                                                     | Nunatagamiut                                   | MacKenzie                                                  | Coronation                                                 | Victoria Is.                                               |
|----------------------|---------------------------------------------------------------|------------------------------------------------------------|-----------------------------------------------------------|------------------------------------------------------------|------------------------------------------------|------------------------------------------------------------|------------------------------------------------------------|------------------------------------------------------------|
| Date                 | 1200-1700 AD                                                  | 1906-1912                                                  | 1968/69                                                   | 1906-1912                                                  | 1906-1912                                      | 1906-1912                                                  | 1906-1912                                                  | 1906-1912                                                  |
| Resource Base        | Precontact traditional coastal high-protein, low carbohydrate | Postcontact modified traditional coastal more carbohydrate | Town resident, constant higher carbohydrate lower protein | Postcontact modified traditional coastal more carbohydrate | Postcontact modified traditional inland hunter | Postcontact modified traditional coastal more carbohydrate | Postcontact modified traditional coastal more carbohydrate | Postcontact modified traditional coastal more carbohydrate |
| Stature              |                                                               |                                                            |                                                           |                                                            |                                                |                                                            |                                                            |                                                            |
| Sex Dimorphism       | NA                                                            | NA                                                         | 1.067                                                     | 1.071                                                      | 1.091                                          | 1.087                                                      | NA                                                         | NA                                                         |
| Male mean            |                                                               |                                                            | <b><i>166.3</i></b>                                       | <b><i>164.6</i></b>                                        | <b><i>169.1</i></b>                            | <b><i>169.0</i></b>                                        |                                                            |                                                            |
| Female mean          |                                                               |                                                            | <b><i>155.8</i></b>                                       | <b><i>153.7</i></b>                                        | <b><i>155.1</i></b>                            | <b><i>155.5</i></b>                                        |                                                            |                                                            |
| Biiliac Breadth      |                                                               |                                                            |                                                           |                                                            |                                                |                                                            |                                                            |                                                            |
| Sex Dimorphism       | 1.023                                                         | NA                                                         | 1.005                                                     | NA                                                         | NA                                             | NA                                                         | NA                                                         | NA                                                         |
| Male mean            | 273.2                                                         |                                                            | 296.7                                                     |                                                            |                                                |                                                            |                                                            |                                                            |
| Female mean          | 266.9                                                         |                                                            | 295.2                                                     |                                                            |                                                |                                                            |                                                            |                                                            |
| Tibial Length        |                                                               |                                                            |                                                           |                                                            |                                                |                                                            |                                                            |                                                            |
| Sex Dimorphism       | 1.103                                                         | NA                                                         | 1.062                                                     | NA                                                         | NA                                             | NA                                                         | NA                                                         | NA                                                         |
| Male mean            | <b><i>359.1</i></b>                                           |                                                            | <b><i>431.9</i></b>                                       |                                                            |                                                |                                                            |                                                            |                                                            |
| Female mean          | <b><i>325.4</i></b>                                           |                                                            | <b><i>406.6</i></b>                                       |                                                            |                                                |                                                            |                                                            |                                                            |
| Total Face ht (N-Mn) |                                                               |                                                            |                                                           |                                                            |                                                |                                                            |                                                            |                                                            |
| Sex Dimorphism       | 1.09                                                          | 1.07                                                       | 1.059                                                     | 1.09                                                       | 1.055                                          | 1.070                                                      | 1.049                                                      | 1.029                                                      |
| Male mean            | <b><i>123.8</i></b>                                           | <b><i>127.9<sub>ns</sub></i></b>                           | <b><i>129.2</i></b>                                       | <b><i>129.6</i></b>                                        | <b><i>127.1<sub>ns</sub></i></b>               | <b><i>125.6<sub>ns</sub></i></b>                           | <b><i>127.7<sub>ns</sub></i></b>                           | <b><i>125.2<sub>ns</sub></i></b>                           |
| Female mean          | <b><i>113.4</i></b>                                           | <b><i>119.5<sub>ns</sub></i></b>                           | <b><i>121.9</i></b>                                       | <b><i>119.2</i></b>                                        | <b><i>120.4<sub>ns</sub></i></b>               | <b><i>117.1<sub>ns</sub></i></b>                           | <b><i>121.7</i></b>                                        | <b><i>121.7</i></b>                                        |
| Upper face ht (N-Pr) |                                                               |                                                            |                                                           |                                                            |                                                |                                                            |                                                            |                                                            |

|                        |              |                 |                 |                 |                 |              |                 |                 |
|------------------------|--------------|-----------------|-----------------|-----------------|-----------------|--------------|-----------------|-----------------|
| Sex Dimorphism         | 1.11         | NA              | 1.045           | NA              | NA              | NA           | NA              | NA              |
| Male mean              | <b>73.3</b>  |                 | 76.9 <i>ns</i>  |                 |                 |              |                 |                 |
| Female mean            | <b>66.0</b>  |                 | 73.6            |                 |                 |              |                 |                 |
| Head length (GOL)      |              |                 |                 |                 |                 |              |                 |                 |
| Sex Dimorphism         | 1.044        | 1.040           | 1.023           | 1.041           | 1.039           | 1.05         | 1.037           | 1.040           |
| Male mean              | <b>186.5</b> | <b>192.5</b>    | <b>190.1</b>    | <b>192.4</b>    | <b>190.0 ns</b> | <b>196.3</b> | <b>195.7 s</b>  | <b>194.3</b>    |
| Female mean            | <b>178.6</b> | <b>185</b>      | <b>185.8</b>    | <b>184.88</b>   | <b>182.7</b>    | <b>186.9</b> | <b>188.7</b>    | <b>186.7</b>    |
| Head Breadth (Eu-Eu)   |              |                 |                 |                 |                 |              |                 |                 |
| Sex Dimorphism         | 1.063        | 1.064           | 1.033           | 1.045           | 1.040           | 1.041        | 1.050           | 1.044           |
| Male mean              | 137.6*       | <b>151.6</b>    | <b>154.6</b>    | <b>151.1</b>    | <b>154.5</b>    | <b>146.7</b> | <b>151.1</b>    | <b>151.7</b>    |
| Female mean            | 129.5*       | <b>142.5 ns</b> | <b>149.6 ns</b> | <b>144.5 ns</b> | <b>148.5 ns</b> | <b>140.9</b> | <b>143.9 ns</b> | <b>145.4 ns</b> |
| Bizygomatic Br (Zy-zy) |              |                 |                 |                 |                 |              |                 |                 |
| Sex Dimorphism         | NA           | 1.039           | 1.056           | 1.054           | 1.043           | 1.043        | 1.087           | 1.051           |
| Male mean              |              | <b>148.4</b>    | <b>151.4</b>    | <b>145.7</b>    | <b>147.1</b>    | <b>144.7</b> | <b>147.1</b>    | <b>147.8</b>    |
| Female mean            |              | <b>142.9</b>    | <b>143.3</b>    | <b>138.2</b>    | <b>140.9</b>    | <b>138.7</b> | <b>138.3</b>    | <b>140.6</b>    |
| Bigonial Br            |              |                 |                 |                 |                 |              |                 |                 |
| Sex Dimorphism         | 1.07         | NA              | 1.07            | NA              | NA              | NA           | NA              | NA              |
| Male mean              | 111.4*       |                 | <b>116.1 ns</b> |                 |                 |              |                 |                 |
| Female mean            | 104.6*       |                 | <b>108.4 ns</b> |                 |                 |              |                 |                 |

\*Lack of significance likely due to combination of small sample size and multiple comparison adjustment using B-Y.

\*\*Kotzebue sample is listed but not discussed due to relatively small sample sizes compared to the other populations.

**Table 2. Arctic Human Significant Differences by Sex Across Groups.** Site name followed by number of variables in parenthesis. Variable abbreviations are: BiB = Biiliac breadth; Bizyg = Bizygomatic; HB = Head breadth; HL = Head length; Stature; TFace = Total Facial Height.

|                                   | <b>Males</b>             | <b>Females</b>              |
|-----------------------------------|--------------------------|-----------------------------|
| <b>Wainwright vs</b>              |                          |                             |
| Barrow (5)                        | HB, Bizyg                | TFace, HB, Bizyg            |
| Nunatagamiut (5)                  | Bizyg                    | TFace                       |
| Mackenzie (5)                     | HL, HB, Bizyg            | TFace, HB, Bizyg            |
| Coronation Gulf (4)               | HB, Bizyg                | TFace, HB, Bizyg            |
| Victoria Island (4)               | -                        | HB                          |
| <b>Barrow vs</b>                  |                          |                             |
| Nunatagamiut (5)                  | HB                       | HB                          |
| Mackenzie (4)                     | HL, HB                   | HB                          |
| Coronation Gulf (4)               | HL                       | HL                          |
| Victoria Island (4)               | -                        | -                           |
| <b>Nunatagmiut vs</b>             |                          |                             |
| Mackenzie (4)                     | HL, HB                   | HL, HB                      |
| Coronation Gulf (4)               | HL, HB                   | HL, HB                      |
| Victoria Island (4)               | HL                       | -                           |
| <b>Mackenzie vs</b>               |                          |                             |
| Coronation Gulf (4)               | HB                       | HB                          |
| Victoria Island (4)               | HB                       | HB                          |
| <b>Coronation vs Victoria (4)</b> | -                        | -                           |
| <b>Point Hope vs</b>              |                          |                             |
| Wainwright (7)                    | BiB, TibL, HB, HL, TFace | BIB, TibL, UFace, TFace, HL |
| Barrow (3)                        | HL, HB                   | HL                          |
| Nunatagamiut (3)                  | HB                       | HL                          |
| Mackenzie (3)                     | HL, HB                   | HL, HB                      |
| Coronation Gulf (3)               | HL, HB                   | TFace, HL                   |
| Victoria Island (3)               | HL, HB                   | TFace, HL                   |

**Table 3. Sexual dimorphism values (male/female) and means by sex for non-Alaskan human samples.** Within sample differences between male and female means that are significant at the 0.05 level (with Benjamini-Yekutieli adjustment for multiple comparisons) are indicated by ***bold and italicized*** values. Stature in cm, all other measurements in mm.

|                        | Boas Central Italian, Foreign-born | Boas Central Italian, U.S.-born | Boas Scotch, Foreign-born   | Boas Scotch, U.S.-born      | Hamman-Todd White Skeletal | Hamman-Todd White Somatic | Erie County Poorhouse |
|------------------------|------------------------------------|---------------------------------|-----------------------------|-----------------------------|----------------------------|---------------------------|-----------------------|
| Date                   | U.S. Immigrants early 1900s        | U.S. Immigrants early 1900s     | U.S. Immigrants early 1900s | U.S. Immigrants early 1900s | U.S. early 1900s           | U.S. early 1900s          | NY, U.S. 1851-1926    |
| Resource Base          |                                    |                                 |                             |                             |                            |                           |                       |
| Stature                |                                    |                                 |                             |                             |                            |                           |                       |
| Sex Dimorphism         | 1.06                               | 1.067                           | 1.08                        | 1.03                        | 1.06                       | 1.08                      | NA                    |
| Male mean              | <b><i>164.4</i></b>                | <b><i>166.2</i></b>             | <b><i>172.1</i></b>         | 171                         | 171.2                      | <b><i>171.1</i></b>       |                       |
| Female mean            | <b><i>154.5</i></b>                | <b><i>155.9</i></b>             | <b><i>159.2</i></b>         | 165.5                       | 162                        | <b><i>159</i></b>         |                       |
| Head Length (GOL)      |                                    |                                 |                             |                             |                            |                           |                       |
| Sex Dimorphism         | 1.044                              | 1.049                           | 1.049                       | 1.063                       | 1.03                       | NA                        | 1.04                  |
| Male mean              | <b><i>189.2</i></b>                | <b><i>187.7</i></b>             | <b><i>196.9</i></b>         | <b><i>196.2</i></b>         | 179.8                      |                           | 185.6                 |
| Female mean            | <b><i>181.2</i></b>                | <b><i>178.8</i></b>             | <b><i>187.6</i></b>         | <b><i>184.5</i></b>         | 175.3                      |                           | 117.4                 |
| Head Breadth (Eu-Eu)   |                                    |                                 |                             |                             |                            |                           |                       |
| Sex Dimorphism         | 1.044                              | 1.039                           | 1.052                       | 1.046                       | NA                         | NA                        | NA                    |
| Male mean              | <b><i>152.8</i></b>                | <b><i>153.3</i></b>             | <b><i>154.2</i></b>         | <b><i>152.9</i></b>         |                            |                           |                       |
| Female mean            | <b><i>146.3</i></b>                | <b><i>147.5</i></b>             | <b><i>146.6</i></b>         | <b><i>146.1</i></b>         |                            |                           |                       |
| Bizygomatic Br (Zy-zy) |                                    |                                 |                             |                             |                            |                           |                       |
| Sex Dimorphism         | 1.058                              | 1.055                           | 1.057                       | 1.050                       | 1.07                       | NA                        | 1.05                  |
| Male mean              | <b><i>140.4</i></b>                | <b><i>137.6</i></b>             | <b><i>139.5</i></b>         | <b><i>137</i></b>           | <b><i>132</i></b>          |                           | 131*                  |
| Female mean            | <b><i>132.7</i></b>                | <b><i>130.4</i></b>             | <b><i>132</i></b>           | <b><i>130.5</i></b>         | <b><i>121.1</i></b>        |                           | 125.2*                |

\*Lack of significance likely due to combination of small sample size and multiple comparison adjustment using B-Y.

**Table 4. Human Data Significant Differences by Sex Across Groups.** For the Boas groups, four variables (Stature, Head Length, Head Breadth, Bizygomatic Breadth) were compared for each living population and seven (Biiliac Breadth, Femoral Head Diameter, Sacral Vreadth, Bizygomatic Breadth, Head Length, Nasion-Prosthion Height, Nasion-Basion Height).

|                                             | <b>Males</b> | <b>Females</b> |
|---------------------------------------------|--------------|----------------|
| <b>Boas Immigrant Studies</b>               |              |                |
| Central Italian Foreign Born vs U.S.        | None         | None           |
| Scotch Foreign Born vs U.S.                 | None         | Stature        |
|                                             |              |                |
| <b>20<sup>th</sup> Century Skeletal</b>     |              |                |
| Hamman-Todd White vs Erie County, Poorhouse | None         | None           |

**Table 5. Sexual dimorphism values (male/female) and means for early 20<sup>th</sup> Century Skeletal Samples.**

Within sample differences between male and female means that are significant at the 0.05 level

(with Benjamini-Yekutieli adjustment for multiple comparisons) are indicated by ***bold and italicized*** values.

Weight and Stature for the Hamann-Todd Skeletal Sample are for those individuals whose skeletons we measured. The ‘Somatic’

Column is somatic data for the entire collection. Weight in lbs, Stature in cm, all other measurements in mm

|                        | Hamman-Todd White Skeletal | Hamman-Todd White Somatic | Erie County Poorhouse |
|------------------------|----------------------------|---------------------------|-----------------------|
| Date                   | U.S. early 1900s           | U.S. early 1900s          | NY, U.S. 1851-1926    |
| <b>Weight</b>          |                            |                           |                       |
| Sex Dimorphism         | 1.18                       | 1.14                      | NA                    |
| Male mean              | 130.4                      | <b><i>122.9</i></b>       |                       |
| Female mean            | 110.1                      | <b><i>107.9</i></b>       |                       |
| <b>Stature</b>         |                            |                           |                       |
| Sex Dimorphism         | 1.06                       | 1.08                      | NA                    |
| Male mean              | 171.2                      | <b><i>171.1</i></b>       |                       |
| Female mean            | 162                        | <b><i>159</i></b>         |                       |
| <b>Biiliac Breadth</b> |                            |                           |                       |
| Sex Dimorphism         | 1.01                       | 0.99                      | 0.98                  |
| Male mean              | 265.6                      | 292.6                     | 273.2                 |
| Female mean            | 262.1                      | 292.8                     | 278                   |
| <b>Femoral Length</b>  |                            |                           |                       |
| Sex Dimorphism         | 1.08                       | NA                        | 1.08                  |
| Male mean              | <b><i>449.6</i></b>        |                           | <b><i>456.5</i></b>   |
| Female mean            | <b><i>417.3</i></b>        |                           | <b><i>423.1</i></b>   |
| <b>Thigh Length</b>    |                            |                           |                       |
| Sex Dimorphism         | NA                         | 1.08                      | NA                    |
| Male mean              |                            | <b><i>488.1</i></b>       |                       |
| Female mean            |                            | <b><i>453.3</i></b>       |                       |
| <b>Femoral Head SI</b> |                            |                           |                       |
| Sex Dimorphism         | 1.12                       | NA                        | 1.13                  |
| Male mean              | <b><i>48</i></b>           |                           | <b><i>48.4</i></b>    |

|                   |             |    |              |
|-------------------|-------------|----|--------------|
| Female mean       | <b>42.7</b> |    | <b>42.7</b>  |
| Tibia Length      |             |    |              |
| Sex Dimorphism    | NA          | NA | 1.07         |
| Male mean         |             |    | 373.1        |
| Female mean       |             |    | 347.2        |
| Humerus Length    |             |    |              |
| Sex Dimorphism    | NA          | NA | 1.08         |
| Male mean         |             |    | <b>330.9</b> |
| Female mean       |             |    | <b>305.8</b> |
| Humerus Head SI   |             |    |              |
| Sex Dimorphism    | NA          | NA | 1.13         |
| Male mean         |             |    | <b>46.7</b>  |
| Female mean       |             |    | <b>41.3</b>  |
| S1 AP             |             |    |              |
| Sex Dimorphism    | 1.12        | NA | NA           |
| Male mean         | <b>32.8</b> |    |              |
| Female mean       | <b>29.4</b> |    |              |
| S1 ML             |             |    |              |
| Sex Dimorphism    | 1.08        | NA | 1.10         |
| Male mean         | 50.9        |    | <b>52.2</b>  |
| Female mean       | 47.6        |    | <b>47.3</b>  |
| Gonial Angle      |             |    |              |
| Sex Dimorphism    | 0.98        | NA | NA           |
| Male mean         | 124.2       |    |              |
| Female mean       | 126.7       |    |              |
| Bigonial Breadth  |             |    |              |
| Sex Dimorphism    | 1.07        | NA | NA           |
| Male mean         | <b>99.4</b> |    |              |
| Female mean       | <b>93.1</b> |    |              |
| Biorbital Breadth |             |    |              |
| Sex Dimorphism    | 1.041       | NA | NA           |
| Male mean         | <b>98.5</b> |    |              |
| Female mean       | <b>94.5</b> |    |              |



|                         |              |    |              |
|-------------------------|--------------|----|--------------|
| Bizygomatic Br (Zy-zy)  |              |    |              |
| Sex Dimorphism          | 1.07         | NA | 1.05         |
| Male mean               | <b>132</b>   |    | 131*         |
| Female mean             | <b>123.1</b> |    | 125.2*       |
| Biauricular Br          |              |    |              |
| Sex Dimorphism          | NA           | NA | 1.058        |
| Male mean               |              |    | <b>123.5</b> |
| Female mean             |              |    | <b>116.7</b> |
| Head Length (GOL)       |              |    |              |
| Sex Dimorphism          | 1.03         | NA | 1.04         |
| Male mean               | 178.8        |    | 185.3        |
| Female mean             | 175.3        |    | 177.4        |
| Nasion-Prosthion height |              |    |              |
| Sex Dimorphism          | 1.11         | NA | 1.10         |
| Male mean               | <b>73.4</b>  |    | 70.9*        |
| Female mean             | <b>66.4</b>  |    | 64.7*        |
| Nasion-Basion Height    |              |    |              |
| Sex Dimorphism          | 1.06         | NA | 1.08         |
| Male mean               | <b>100.8</b> |    | <b>100.6</b> |
| Female mean             | <b>95.6</b>  |    | <b>93</b>    |
| Mastoid Height          |              |    |              |
| Sex Dimorphism          | NA           | NA | 1.09         |
| Male mean               |              |    | 30.3         |
| Female mean             |              |    | 27.7         |

\*Lack of significance likely due to combination of small sample size and multiple comparison adjustment using B-Y.

**Table 6. Kenyan Vervet Sample, *Chlorocebus aethiops pygerythrus*. Sexual dimorphism values (male/female) and means by sex.**  
Weight in kg, all other measurements in cm.

|                    | Naivasha                  | Mosiro              | Kimana                          | Samburu             | Skeletal Wild | Skeletal Captive |
|--------------------|---------------------------|---------------------|---------------------------------|---------------------|---------------|------------------|
| Resource Base      | Cultivated crops abundant | No cultivated crops | Some cultivated crops available | No cultivated crops |               |                  |
| Weight             |                           |                     |                                 |                     |               |                  |
| Sex Dimorphism     | 1.48                      | 1.5                 | 1.34                            | 1.58                | 1.14          |                  |
| Male mean          | 4.9                       | 4.2                 | 4.3                             | 4.1                 | 4.1           | N/A              |
| Female mean        | 3.3                       | 2.8                 | 3.2                             | 2.6                 | 3.6           |                  |
| Body Length        |                           |                     |                                 |                     |               |                  |
| Sex Dimorphism     | 1.13                      | 1.17                | 1.10                            | 1.15                |               |                  |
| Male mean          | 43.5                      | 42                  | 42.6                            | 39.8                | N/A           | N/A              |
| Female mean        | 38.6                      | 36                  | 38.7                            | 34.5                |               |                  |
| Chest Girth        |                           |                     |                                 |                     |               |                  |
| Sex Dimorphism     | 1.15                      | 1.16                | 1.12                            | 1.18                |               |                  |
| Male mean          | 35.7                      | 33.9                | 32.7                            | 32.7                | N/A           | N/A              |
| Female mean        | 31.1                      | 29.1                | 29.1                            | 27.8                |               |                  |
| Upper Arm Length   |                           |                     |                                 |                     |               |                  |
| Sex Dimorphism     | 1.11                      | 1.2                 | 1.14                            | 1.18                | 1.12          | 1.14             |
| Male mean          | 14.5                      | 15                  | 13.8                            | 14.6                | 12.8          | 12.8             |
| Female mean        | 13.1                      | 12.5                | 12.1                            | 12.4                | 11.4          | 11.2             |
| Leg (Thigh) Length |                           |                     |                                 |                     |               |                  |
| Sex Dimorphism     | 1.15                      | 1.17                | 1.16                            | 1.21                | 1.11          | 1.15             |
| Male mean          | 16.9                      | 16.4                | 15.7                            | 16.5                | 14.9          | 15.5             |
| Female mean        | 14.7                      | 14                  | 13.5                            | 13.6                | 13.4          | 13.5             |
| Tail Length        |                           |                     |                                 |                     |               |                  |
| Sex Dimorphism     | 1.17                      | 1.2                 | 1.07                            | 1.21                |               |                  |

|                  |      |      |      |      |      |      |
|------------------|------|------|------|------|------|------|
| Male mean        | 61.8 | 64.8 | 58   | 67   | N/A  | N/A  |
| Female mean      | 52.6 | 54.1 | 54.2 | 55.2 |      |      |
| Head             |      |      |      |      |      |      |
| Sex Dimorphism   | 1.10 | 1.07 | 1.07 | 1.13 | 1.10 | 1.08 |
| Male mean        | 10.0 | 9.4  | 9.1  | 11.1 | 7.6  | 7.9  |
| Female mean      | 9.1  | 8.8  | 8.5  | 9.8  | 6.9  | 7.3  |
| Hand Length      |      |      |      |      |      |      |
| Sex Dimorphism   | 1.19 | 1.21 | 1.15 | 1.21 |      |      |
| Male mean        | 10.0 | 10.1 | 9.5  | 9.4  | N/A  | N/A  |
| Female mean      | 8.4  | 8.4  | 8.3  | 7.8  |      |      |
| Foot Length      |      |      |      |      |      |      |
| Sex Dimorphism   | 1.14 | 1.18 | 1.14 | 1.20 |      |      |
| Male mean        | 14.1 | 14.9 | 13.7 | 14.1 | N/A  | N/A  |
| Female mean      | 12.4 | 12.6 | 12.0 | 11.8 |      |      |
| Lower Arm Length |      |      |      |      |      |      |
| Sex Dimorphism   | 1.12 | 1.15 | 1.15 | 1.18 |      |      |
| Male mean        | 15.0 | 15.0 | 14.6 | 14.7 | N/A  | N/A  |
| Female mean      | 13.4 | 13.0 | 12.7 | 12.5 |      |      |
| Lower Leg Length |      |      |      |      |      |      |
| Sex Dimorphism   | 1.15 | 1.19 | 1.16 | 1.20 | 1.14 | 1.17 |
| Male mean        | 17.2 | 17.0 | 16.4 | 16.4 | 14.7 | 15.1 |
| Female mean      | 15.0 | 14.3 | 14.1 | 13.6 | 12.9 | 12.9 |

**Table 7. Kenyan Vervets Significant Differences by Sex Across Groups** arranged from most to least differences. Twelve variables were measured for each population. Variable abbreviations are: Wt = weight, BL = Body Length, BB = Body Breadth, CG = Chest girth, Hand = hand length, UA = Upper Arm length, LA = forearm length, Head = circumference, UL = Thigh length, LL = Lower leg length, Foot and Tail lengths. Data source as per text. Bold abbreviations are those in which significant differences in CVs between groups in the mixed-sex sample would have suggested the difference in group means based on sex-matched samples.

|                     | Males            | Females                            | Mixed-Sex                  |
|---------------------|------------------|------------------------------------|----------------------------|
| Naivasha vs Samburu | WT, CG, BL, Tail | WT, BL, CG, Hand, LA, UL, LL, Foot | BL, <b>CG</b> , Head, Tail |
| Samburu vs Kimana   | Head             | WT, BL, BB, Head                   | WT, BL, BB, <b>Head</b>    |
| Naivasha vs Kimana  | CG               | UA, LA, UL, LL                     | -                          |
| Naivasha vs Mosiro  | -                | WT                                 | -                          |
| Mosiro vs Kimana    | UA, Foot         | -                                  | -                          |
| Mosiro vs Samburu   | Head             | -                                  | Head                       |

**Table 8. Kenyan Vervet CV by Population.** Mixed sex CVs are reliably higher than single sex CVs.

|        | <b>Samburu</b> |       |        | <b>Kimana</b> |       |        | <b>Naivasha</b> |       |        | <b>Mosiro</b> |       |        |
|--------|----------------|-------|--------|---------------|-------|--------|-----------------|-------|--------|---------------|-------|--------|
|        | Mixed Sex      | Male  | Female | Mixed Sex     | Male  | Female | Mixed Sex       | Male  | Female | Mixed Sex     | Male  | Female |
| Weight | 26.16          | 13.58 | 10.49  | 20.67         | 13.68 | 12.96  | 22.80           | 10.83 | 13.58  | 25.02         | 18.74 | 11.25  |
| BL     | 8.84           | 5.75  | 4.30   | 7.73          | 6.99  | 4.83   | 8.95            | 7.34  | 7.14   | 9.36          | 5.46  | 6.21   |
| BB     | 8.41           | 4.74  | 3.77   | 7.33          | 5.36  | 3.57   | 9.90            | 5.73  | 7.63   | 8.88          | 3.66  | 7.05   |
| CG     | 10.43          | 7.29  | 5.50   | 9.03          | 6.81  | 7.18   | 8.99            | 5.58  | 6.38   | 10.13         | 9.27  | 6.16   |
| Hand   | 12.02          | 5.65  | 8.76   | 9.71          | 6.00  | 7.54   | 10.11           | 5.24  | 6.73   | 11.71         | 8.96  | 7.32   |
| UA     | 12.51          | 7.31  | 11.20  | 9.11          | 6.82  | 5.93   | 8.17            | 6.78  | 6.62   | 9.45          | 0.00  | 4.77   |
| LA     | 10.95          | 8.83  | 5.24   | 8.61          | 5.59  | 4.16   | 6.84            | 4.95  | 4.72   | 8.41          | 5.78  | 4.80   |
| Head   | 19.29          | 18.50 | 18.37  | 7.89          | 8.08  | 5.68   | 12.06           | 10.00 | 11.86  | 7.23          | 5.43  | 7.26   |
| UL     | 11.52          | 6.43  | 7.25   | 8.94          | 5.14  | 4.51   | 10.96           | 10.05 | 8.74   | 8.41          | 3.11  | 4.12   |
| LL     | 11.32          | 6.30  | 6.60   | 9.01          | 4.86  | 5.23   | 9.29            | 6.28  | 7.16   | 9.28          | 2.55  | 4.72   |
| Foot   | 12.09          | 6.53  | 9.15   | 7.75          | 4.18  | 3.86   | 8.77            | 10.26 | 4.47   | 9.33          | 1.79  | 5.86   |
| Tail   | 12.19          | 6.09  | 8.43   | 16.79         | 21.31 | 5.98   | 10.73           | 5.53  | 8.67   | 11.48         | 9.12  | 7.37   |

**Table 9a. Japanese Macaque Sample.** Sexual dimorphism values (male/female) and means by sex. Extant troops from East to West starting with Nikko. Latitude provided. Data sources as per text. Weight in kg, all other measurements in cm.

|                                                     | Chiba        | East Honshu  |                           |                           |                           |              | Chu goku           |              |
|-----------------------------------------------------|--------------|--------------|---------------------------|---------------------------|---------------------------|--------------|--------------------|--------------|
|                                                     | T-1 Skeletal | Nikko        | Shiga                     | Hagachizaki               | Takahama                  | Arashiyama   | Wakasa             | Ngatoro      |
| Latitude                                            |              | 36.56        | 36.73                     | 34.69                     | 35.49                     | 35           | 35.33              | 34.81        |
| Jan Temp/August Temp C                              |              | -1.4/22.2    | -6.9/19.8                 | 5.6/26.3                  | 4/26.6                    | 2.8/26.8     | 2.3/24.7           | 3.3/27.1     |
| Forest type                                         |              | Deciduous    | Deciduous                 |                           | Evergreen                 | Evergreen    | Evergreen          |              |
| Extreme rainfall (dry mos <60mm/wet mos>100mm x100) |              | More wet mos | More dry mos<br>Deep Snow | No precipitation extremes | No precipitation extremes | More wet mos | No precip extremes | More wet mos |
| <b>Weight</b>                                       |              |              |                           |                           |                           |              |                    |              |
| Sex Dimorphism                                      | NA           | 1.31         | 1.20                      | 1.29                      | 1.40                      | 1.39         | 1.33               | 1.58         |
| Male mean                                           |              | <b>12.09</b> | <b>14.17</b>              | <b>11.88</b>              | <b>11.95</b>              | <b>12.62</b> | <b>11.73</b>       | <b>14.93</b> |
| Female mean                                         |              | <b>9.24</b>  | <b>11.86</b>              | <b>9.18</b>               | <b>8.51</b>               | <b>9.1</b>   | <b>8.8</b>         | <b>9.45</b>  |
| <b>Anterior Trunk Length</b>                        |              |              |                           |                           |                           |              |                    |              |
| Sex Dimorphism                                      | NA           | 1.09         | 1.06                      | 1.07                      | 1.09                      | 1.11         | 1.11               | 1.08         |
| Male mean                                           |              | <b>403.3</b> | <b>413.6</b>              | <b>401.1</b>              | <b>404.2</b>              | <b>411.2</b> | <b>397.6</b>       | <b>399.1</b> |
| Female mean                                         |              | <b>371.4</b> | <b>391.2</b>              | <b>374.6</b>              | <b>369.9</b>              | <b>371.8</b> | <b>358.5</b>       | <b>371</b>   |
| <b>Tail Length</b>                                  |              |              |                           |                           |                           |              |                    |              |
| Sex Dimorphism                                      | NA           | 1.19         | 1.13                      | 1.13                      | 1.28                      | 1.19         | 1.05               | 1.17         |
| Male mean                                           |              | 87.6         | <b>90</b>                 | <b>81.2</b>               | <b>108.1</b>              | <b>97</b>    | 90.7               | <b>99.2</b>  |
| Female mean                                         |              | 73.9         | <b>79.3</b>               | <b>71.8</b>               | <b>84.2</b>               | <b>81.7</b>  | 86                 | <b>84.9</b>  |
| <b>Biacromial Breadth</b>                           |              |              |                           |                           |                           |              |                    |              |
| Sex Dimorphism                                      | NA           | 1.16         | 1.09                      | 1.13                      | 1.21                      | 1.09         | 1.16               | 1.13         |
| Male mean                                           |              | <b>141.4</b> | <b>138.2</b>              | <b>141.6</b>              | <b>150.5</b>              | 142.9        | <b>148.2</b>       | <b>142.3</b> |
| Female mean                                         |              | <b>122.3</b> | <b>126.9</b>              | <b>125</b>                | <b>123.9</b>              | 131          | <b>127.9</b>       | <b>126</b>   |
| <b>Biiliac Breadth</b>                              |              |              |                           |                           |                           |              |                    |              |
| Sex Dimorphism                                      | NA           | 1.03         | 1.07                      | 1.06                      | 1.09                      | 1.09         | 1.10               | 1.08         |
| Male mean                                           |              | <b>112.1</b> | <b>126.8</b>              | <b>114.8</b>              | 109.4                     | <b>114.3</b> | 111.2              | <b>121.1</b> |
| Female mean                                         |              | <b>108.7</b> | <b>118.1</b>              | <b>108</b>                | 100.6                     | <b>105.3</b> | 100.8              | <b>111.7</b> |
| <b>Thorax Circumference</b>                         |              |              |                           |                           |                           |              |                    |              |

|                           |              |              |              |              |              |              |              |              |
|---------------------------|--------------|--------------|--------------|--------------|--------------|--------------|--------------|--------------|
| Sex Dimorphism            | NA           | 1.15         | 1.05         | 1.10         | 1.08         | 1.09         | 1.09         | 1.14         |
| Male mean                 |              | 510.4        | <b>503.2</b> | <b>471.6</b> | <b>467.1</b> | <b>475.3</b> | 458          | <b>508.8</b> |
| Female mean               |              | 443          | <b>480.5</b> | <b>429.5</b> | <b>434.2</b> | <b>434.4</b> | 418.7        | <b>445.8</b> |
| Upper Arm Length/ Humerus |              |              |              |              |              |              |              |              |
| Sex Dimorphism            | 1.13         | 1.13         | 1.08         | 1.11         | 1.12         | 1.14         | 1.11         | 1.13         |
| Male mean                 | <b>156.3</b> | <b>171.9</b> | <b>169.2</b> | <b>172.9</b> | <b>170</b>   | <b>175.3</b> | <b>169</b>   | <b>169.7</b> |
| Female mean               | <b>138.3</b> | <b>152.2</b> | <b>157.2</b> | <b>155.3</b> | <b>151.7</b> | <b>154.3</b> | <b>151.6</b> | <b>149.8</b> |
| Fore Arm Length           |              |              |              |              |              |              |              |              |
| Sex Dimorphism            |              | 1.12         | 1.08         | 1.11         | 1.17         | 1.10         | 1.13         | 1.15         |
| Male mean                 |              | <b>177.6</b> | <b>173.9</b> | <b>183.8</b> | <b>181.4</b> | <b>175.1</b> | <b>172.8</b> | <b>178.1</b> |
| Female mean               |              | <b>158.7</b> | <b>161.2</b> | <b>165.8</b> | <b>155.7</b> | <b>159.2</b> | <b>152.4</b> | <b>155.1</b> |
| Hand Length               |              |              |              |              |              |              |              |              |
| Sex Dimorphism            |              | 1.11         |              | 1.13         | 1.12         | 1.12         | 1.12         | 1.16         |
| Male mean                 |              | <b>106.1</b> | --           | <b>117.4</b> | <b>116.6</b> | <b>117.4</b> | <b>113.8</b> | <b>120.6</b> |
| Female mean               |              | <b>95.3</b>  | 105.8        | <b>104.1</b> | <b>104.5</b> | <b>105</b>   | <b>102</b>   | <b>104.1</b> |
| Thigh Length Femur L      |              |              |              |              |              |              |              |              |
| Sex Dimorphism            | 1.10         | 1.15         | 1.07         | 1.13         | 1.14         | 1.16         | 1.16         | 1.17         |
| Male mean                 | <b>173.5</b> | <b>198.4</b> | <b>187.7</b> | <b>203.7</b> | <b>197.4</b> | <b>197.9</b> | <b>192</b>   | <b>203</b>   |
| Female mean               | <b>157.7</b> | <b>172.1</b> | <b>176.1</b> | <b>179.9</b> | <b>173.7</b> | <b>170.2</b> | <b>165</b>   | <b>173.2</b> |
| Lower Leg Length Tibia L  |              |              |              |              |              |              |              |              |
| Sex Dimorphism            | 1.11         | 1.13         | 1.11         | 1.11         | 1.15         | 1.13         | 1.05         | 1.18         |
| Male mean                 | <b>169.1</b> | <b>178.7</b> | <b>180.7</b> | <b>186.6</b> | <b>182.7</b> | <b>186.8</b> | 166.6        | <b>186.6</b> |
| Female mean               | <b>152.1</b> | <b>158.8</b> | <b>163.3</b> | <b>168.8</b> | <b>159.5</b> | <b>165.9</b> | 158.4        | <b>158.1</b> |
| Foot Length               |              |              |              |              |              |              |              |              |
| Sex Dimorphism            |              | 1.12         | 1.08         | 1.11         | 1.09         | 1.12         | 1.12         | 1.14         |
| Male mean                 |              | <b>167</b>   | <b>178.4</b> | <b>181.6</b> | <b>173</b>   | <b>177.5</b> | <b>172.6</b> | <b>181.1</b> |
| Female mean               |              | <b>148.5</b> | <b>164.8</b> | <b>163.6</b> | <b>158.1</b> | <b>158.7</b> | <b>153.8</b> | <b>158.6</b> |
| Foot Breadth              |              |              |              |              |              |              |              |              |
| Sex Dimorphism            |              | 1.09         | 1.12         | 1.13         | 1.02         | 1.14         | 1.17         | 1.16         |
| Male mean                 |              | <b>41.1</b>  | <b>46.3</b>  | <b>44.4</b>  | <b>40.6</b>  | <b>44.1</b>  | <b>43.6</b>  | <b>42.3</b>  |
| Female mean               |              | <b>37.8</b>  | <b>41.3</b>  | <b>39.4</b>  | <b>39.7</b>  | <b>38.6</b>  | <b>37.4</b>  | <b>36.5</b>  |

|                                                     | Chiba        | East Honshu  |                           |                           |                           |              | Chu goku           |              |
|-----------------------------------------------------|--------------|--------------|---------------------------|---------------------------|---------------------------|--------------|--------------------|--------------|
|                                                     | T-1 Skeletal | Nikko        | Shiga                     | Hagachizaki               | Takahama                  | Arashiyama   | Wakasa             | Ngatoro      |
| Latitude                                            |              | 36.56        | 36.73                     | 34.69                     | 35.49                     | 35           | 35.33              | 34.81        |
| Jan Temp/August Temp C                              |              | -1.4/22.2    | -6.9/19.8                 | 5.6/26.3                  | 4/26.6                    | 2.8/26.8     | 2.3/24.7           | 3.3/27.1     |
| Forest type                                         |              | Deciduous    | Deciduous                 |                           |                           | Evergreen    |                    |              |
| Extreme rainfall (dry mos <60mm/wet mos>100mm x100) |              | More wet mos | More dry mos<br>Deep Snow | No precipitation extremes | No precipitation extremes | More wet mos | No precip extremes | More wet mos |
| <b>Head Length</b>                                  |              |              |                           |                           |                           |              |                    |              |
| Sex Dimorphism                                      | --           | 1.05         | 1.04                      | 1.06                      | 1.06                      | 1.08         | 1.11               | 1.11         |
| Male mean                                           | --           | <b>97.7</b>  | <b>103.8</b>              | <b>102.8</b>              | 105                       | <b>105.7</b> | 101.6              | <b>107.2</b> |
| Female mean                                         | 86.4         | <b>92.9</b>  | <b>99.4</b>               | <b>96.8</b>               | 98.6                      | <b>98.3</b>  | 91.9               | <b>96.9</b>  |
| <b>Head Breadth</b>                                 |              |              |                           |                           |                           |              |                    |              |
| Sex Dimorphism                                      |              | 1.07         | 1.07                      | 1.12                      | 1.07                      | 1.13         | 1.15               | 1.17         |
| Male mean                                           |              | <b>81.7</b>  | <b>83.8</b>               | <b>87</b>                 | 81.8                      | <b>87.4</b>  | 88.4               | <b>88.8</b>  |
| Female mean                                         |              | <b>76.3</b>  | <b>78.1</b>               | <b>77.5</b>               | 76.6                      | <b>77.6</b>  | 77.2               | <b>75.7</b>  |
| <b>Bizygomatic Breadth</b>                          |              |              |                           |                           |                           |              |                    |              |
| Sex Dimorphism                                      |              | 1.11         | 1.11                      | 1.13                      | 1.10                      | 1.14         | 1.11               | 1.17         |
| Male mean                                           |              | <b>98.3</b>  | <b>102.3</b>              | <b>99.9</b>               | 98.9                      | <b>104.4</b> | 98.2               | <b>102.1</b> |
| Female mean                                         |              | <b>88.3</b>  | <b>92.4</b>               | <b>88.7</b>               | 90.2                      | <b>91.5</b>  | 88.1               | <b>87.5</b>  |



**Table 9b. Japanese Macaque Sample, Continued.** Weight in kg, all other measurements in cm.

|                                                     | Island of Setouchi Sea |              | Kyus hu      |              | Captive                              |
|-----------------------------------------------------|------------------------|--------------|--------------|--------------|--------------------------------------|
|                                                     | Awajishima             | Shodoshimo   | Takasakiyama | Koshima      | <i>M.f. yakui</i>                    |
| Latitude                                            | 34.24                  | 34.5         | 33.17        | 31.45        | 30.56                                |
| Temperature - Jan/August in C                       | 4.1/26.5               | 5/27.2       | 4.9/26.1     | 6.7/26.8     | 11.2/26.7                            |
| Forest type                                         | Evergreen              | Deciduous    | Evergreen    | Evergreen    | Evergreen                            |
| Extreme rainfall (dry mos <60mm/wet mos>100mm x100) | More wet mos           | More wet mos | More wet mos | More wet mos | Provisioned<br>No precip<br>extremes |
| <b>Weight</b>                                       |                        |              |              |              |                                      |
| Sex Dimorphism                                      | 1.51                   | 1.21         | 1.40         | 1.28         | 1.27                                 |
| Male mean                                           | <b>10.78</b>           | <b>10.74</b> | <b>10.85</b> | <b>8.05</b>  | <b>10.17</b>                         |
| Female mean                                         | <b>7.14</b>            | <b>8.91</b>  | <b>7.77</b>  | <b>6.31</b>  | <b>7.98</b>                          |
| <b>Anterior Trunk Length</b>                        |                        |              |              |              |                                      |
| Sex Dimorphism                                      | 1.10                   | 1.11         | 1.08         | 1.06         | 1.09                                 |
| Male mean                                           | <b>387.4</b>           | <b>392.8</b> | <b>392.4</b> | <b>366</b>   | <b>367.8</b>                         |
| Female mean                                         | <b>353.3</b>           | <b>355</b>   | <b>363.7</b> | <b>346.2</b> | <b>338.7</b>                         |
| <b>Tail Length</b>                                  |                        |              |              |              |                                      |
| Sex Dimorphism                                      | 1.14                   | 1.17         | 1.09         | 1.10         | 1.13                                 |
| Male mean                                           | <b>88</b>              | <b>102.1</b> | 94           | 80.4         | <b>101.4</b>                         |
| Female mean                                         | <b>77.3</b>            | <b>87.2</b>  | 86.5         | 73.3         | <b>90</b>                            |
| <b>Biacromial Breadth</b>                           |                        |              |              |              |                                      |
| Sex Dimorphism                                      | 1.16                   | 1.12         | 1.12         | 1.05         | 1.18                                 |
| Male mean                                           | <b>152.3</b>           | <b>143.9</b> | <b>134.8</b> | 116.8        | <b>129.4</b>                         |
| Female mean                                         | <b>130.9</b>           | <b>128</b>   | <b>119.9</b> | 110.9        | <b>110.1</b>                         |
| <b>Biiliac Breadth</b>                              |                        |              |              |              |                                      |
| Sex Dimorphism                                      | 1.09                   | 1.18         | 1.08         | 1.04         | 1.09                                 |
| Male mean                                           | <b>109</b>             | <b>116.7</b> | <b>107.3</b> | <b>100.5</b> | <b>112.2</b>                         |
| Female mean                                         | <b>100.3</b>           | <b>99.1</b>  | <b>99.4</b>  | <b>96.3</b>  | <b>102.9</b>                         |
| <b>Thorax Circumference</b>                         |                        |              |              |              |                                      |
| Sex Dimorphism                                      | 1.13                   | 1.09         | 1.10         | 1.08         | 1.08                                 |

|                         |              |              |              |              |              |
|-------------------------|--------------|--------------|--------------|--------------|--------------|
| Male mean               | <b>448.6</b> | <b>446.9</b> | <b>442.1</b> | <b>397</b>   | <b>423.1</b> |
| Female mean             | <b>397.8</b> | <b>408.4</b> | <b>401.2</b> | <b>368.1</b> | <b>393.3</b> |
| <b>Upper Arm Length</b> |              |              |              |              |              |
| Sex Dimorphism          | 1.13         | 1.14         | 1.11         | 1.07         | 1.19         |
| Male mean               | <b>161</b>   | <b>164.5</b> | <b>164.5</b> | <b>156.6</b> | <b>157.5</b> |
| Female mean             | <b>143.1</b> | <b>144.3</b> | <b>148.7</b> | <b>146.3</b> | <b>132.5</b> |
| <b>Fore Arm Length</b>  |              |              |              |              |              |
| Sex Dimorphism          | 1.13         | 1.17         | 1.09         | 1.08         | 1.18         |
| Male mean               | <b>168.5</b> | <b>177.4</b> | <b>171.3</b> | <b>164.5</b> | <b>168.2</b> |
| Female mean             | <b>149.6</b> | <b>151.5</b> | <b>156.6</b> | <b>151.8</b> | <b>142.1</b> |
| <b>Hand Length</b>      |              |              |              |              |              |
| Sex Dimorphism          | 1.15         | 1.23         | 1.11         | 1.06         | 1.11         |
| Male mean               | <b>111.3</b> | <b>109.1</b> | <b>111.2</b> | <b>105.6</b> | <b>104.3</b> |
| Female mean             | <b>96.6</b>  | <b>88.5</b>  | <b>100.6</b> | <b>99.4</b>  | <b>93.7</b>  |
| <b>Thigh Length</b>     |              |              |              |              |              |
| Sex Dimorphism          | 1.15         | 1.18         | 1.11         | 1.09         | 1.15         |
| Male mean               | <b>189.3</b> | <b>190</b>   | <b>190.8</b> | <b>178.8</b> | <b>168.4</b> |
| Female mean             | <b>164.3</b> | <b>161.2</b> | <b>171.7</b> | <b>164.6</b> | <b>146.3</b> |
| <b>Lower Leg Length</b> |              |              |              |              |              |
| Sex Dimorphism          | 1.18         | 1.19         | 1.12         | 1.08         | 1.16         |
| Male mean               | <b>169.4</b> | <b>175.4</b> | <b>174.4</b> | <b>164.6</b> | <b>162.6</b> |
| Female mean             | <b>143.6</b> | <b>147.5</b> | <b>156.4</b> | <b>151.9</b> | <b>139.6</b> |
| <b>Foot Length</b>      |              |              |              |              |              |
| Sex Dimorphism          | 1.14         | 1.15         | 1.10         | 1.08         | 1.14         |
| Male mean               | <b>168.6</b> | <b>159.6</b> | <b>170.3</b> | <b>164.1</b> | <b>155.7</b> |
| Female mean             | <b>147.6</b> | <b>139</b>   | <b>155.1</b> | <b>152.6</b> | <b>137</b>   |
| <b>Foot Breadth</b>     |              |              |              |              |              |
| Sex Dimorphism          | 1.07         | 1.17         | 1.09         | 1.06         | 1.13         |
| Male mean               | <b>41.6</b>  | <b>44</b>    | <b>42.9</b>  | <b>39.7</b>  | <b>38.7</b>  |
| Female mean             | <b>38.9</b>  | <b>37.7</b>  | <b>39.3</b>  | <b>37.6</b>  | <b>34.4</b>  |

**Table 9b.** Japanese Macaque Sample, Continued.

|                                                     | Island of Setouchi Sea |              | Kyus hu      |              | Captive                              |
|-----------------------------------------------------|------------------------|--------------|--------------|--------------|--------------------------------------|
|                                                     | Awajishima             | Shodoshimo   | Takasakiyama | Koshima      | <i>M.f. yakui</i>                    |
| Latitude                                            | 34.24                  | 34.5         | 33.17        | 31.45        | 30.56                                |
| Forest type                                         | Evergreen              | Deciduous    | Evergreen    | Evergreen    | Evergreen                            |
| Temperature - Jan/August in C                       | 4.1/26.5               | 5/27.2       | 4.9/26.1     | 6.7/26.8     | 11.2/26.7                            |
| Extreme rainfall (dry mos <60mm/wet mos>100mm x100) | More wet mos           | More wet mos | More wet mos | More wet mos | Provisioned<br>No precip<br>extremes |
| Head Length                                         |                        |              |              |              |                                      |
| Sex Dimorphism                                      | 1.48                   | 1.06         | 1.05         | 1.03         | 1.08                                 |
| Male mean                                           | <b>103.4</b>           | <b>94.6</b>  | <b>99.4</b>  | <b>92.3</b>  | <b>96.3</b>                          |
| Female mean                                         | <b>69.9</b>            | <b>89.6</b>  | <b>94.3</b>  | <b>89.2</b>  | <b>89.2</b>                          |
| Head Breadth                                        |                        |              |              |              |                                      |
| Sex Dimorphism                                      | 1.11                   | 1.09         | 1.10         | 1.04         | 1.07                                 |
| Male mean                                           | <b>84.5</b>            | <b>82.1</b>  | <b>83.5</b>  | <b>74.6</b>  | <b>76.5</b>                          |
| Female mean                                         | <b>76.1</b>            | <b>75.2</b>  | <b>76.1</b>  | <b>71.4</b>  | <b>71.3</b>                          |
| Bizygomatic Breadth                                 |                        |              |              |              |                                      |
| Sex Dimorphism                                      | 1.13                   | 1.13         | 1.10         | 1.06         | 1.16                                 |
| Male mean                                           | <b>96.8</b>            | <b>97.2</b>  | <b>94</b>    | <b>88.1</b>  | <b>97.8</b>                          |
| Female mean                                         | <b>85.6</b>            | <b>85.8</b>  | <b>85.1</b>  | <b>83</b>    | <b>84.6</b>                          |

**Table 10. Japanese Macaque Significant Differences by Sex Across Groups.** Twelve variables were measured for each living population. Variable abbreviations are: Wt = weight, ATL = Anterior Trunk Lengh, Tail = Tail Length, Biac = Biacromial L, BiL = Biiliac Br, Tho = Thorax Circumference, UA = Upper Arm length, LA = forearm length, Hand = hand length, UL = Thigh length, LL = Lower leg length, FtL = Foot Length, FtBr = Foot Breadth, HL = Head Length, HB = Head Breadth Bizyg = Bizygomatic breadth.

|                 | <b>Males</b>                                            | <b>Females</b>                                               |
|-----------------|---------------------------------------------------------|--------------------------------------------------------------|
| <b>Nikko vs</b> |                                                         |                                                              |
| Shiga           | Wt, BiL, Hand, FtBr, HL                                 | Wt, ATL, Bil, Tho, Hand, FtBr, FtL, HL, Bizyg                |
| Hagachizaki     | Hand, FtL, FtBr, HL, HB                                 | LA, Hand, UL, LL, FtL, HL                                    |
| Takahama        | Hand                                                    | Hand, FtL, HL                                                |
| Arashiyama      | Hand, HL, Bizyg                                         | Hand, FtL, HL                                                |
| Wakasa          | LL                                                      | None                                                         |
| Nagatoro        | Wt, Bil, Hand, FtL, HL, HB                              | Tail, Hand, FtL, HL                                          |
| Awajishima      | HL                                                      | Wt, ATL, BiL, LA, LL HL                                      |
| Shodoshimo      | FtBr                                                    | Tail, BiL, Tho, UA, UL, LL, FtL, HL                          |
| Takasakiyama    | None                                                    | Wt, Tail, BiL, Tho, Hand, FtL, Bizyg                         |
| Koshima         | Wt, ATL, Biac, BiL, Tho, UA, LA, UL, LL, HL, HB, Bizyg  | Wt, ATL, BiL, Tho, LA, Hand, UL, HL, HB, Bizyg               |
| M.f. yakui      | Wt, ATL, Tho, UA, UL, LL, HB                            | Wt, ATL, Tail, Tho, UA, LA, UL, LL, FtL, FtB, HL, HB, Bizyg  |
| <b>Shiga vs</b> |                                                         |                                                              |
| Hagachizaki     | Wt, BiL, Tho, LA, Han, UL                               | Wt, ATL, Tail, BiL, Tho, FtBr, HL, Bizyg                     |
| Takahama        | BiL, Hand, FtBr                                         | Wt, BiL, Tho, UA, FtL, FtBr, Bizyg                           |
| Arashiyama      | BiL                                                     | Wt, ATL, BiL, Tho, FtBr                                      |
| Wakasa          | Wt, BiL, Hand, FtB                                      | Wt, ATL, BiL, Tho, FtL, FtBr                                 |
| Nagatoro        | Tail, Hand, UL, FtBr, HB                                | Wt, ATL, BiL, Tho, UA, LA, FtL, FtBr, HL, HB, Bizyg          |
| Awajishima      | Wt, ATL, Biac, BiL, Tho, UA, Hand, LL, FtL, FtBr, Bizyg | Wt, ATL, BiL, Tho, UA, LA, Hand, UL, LL, FtL, FtB, HL, Bizyg |
| Shodoshimo      | Wt, ATL, Tail, BiL, Tho, Hand, FtL,                     | Wt, ATL, Tail, BiL, Tho, UA, Hand, UL,                       |

|                       |                                                                          |                                                                              |
|-----------------------|--------------------------------------------------------------------------|------------------------------------------------------------------------------|
|                       | HL                                                                       | LL, FtL, FtB, HL, HB, Bizyg                                                  |
| Takasakiyama          | Wt, ATL, BiL, Tho, Hand, FtL, FtBr, HL, Bizyg                            | Wt, ATL, Tail, Biac, BiL, Tho, UA, Hand, LL, FtL, FtB, HL, HB, Bizyg         |
| Koshima               | Wt, ATL, Tail, Bia, BiL, Tho, UA, LA, Hand, LL, FtL, FtBr, HL, HB, Bizyg | Wt, ATL, Tail, Biac, BiL, Tho, UA, LA, Hand, UL, LL, FtL, FtB, HL, HB, Bizyg |
| M.f. yakui            | Wt, ATL, Tail, BiL, Tho, UA, Hand, UL, LL, FtL, FtB, HL, HB, Bizyg       | Wt, ATL, Tail, Biac, BiL, Tho, UA, LA, Hand, UL, LL, FtL, FtB, HL, HB, Bizyg |
| <b>Hagachizaki vs</b> |                                                                          |                                                                              |
| Takahama              | Tail, FtL, FtBr                                                          | BiL, LA, FtBr                                                                |
| Arashiyama            | Tail                                                                     | Tail, LA, UL, Bizyg                                                          |
| Wakasa                | LA, LL                                                                   | ATL, LA, FtL                                                                 |
| Nagatoro              | Wt, Tail, Tho, HL                                                        | Tail, UA, LA, UL, LL, FtL, FtBr                                              |
| Awajishima            | Biac, BiL, Hand, UL, LL, FtL, FtBr                                       | Wt, ATL, BiL, UA, LA, Hand, UL, LL, FtL, FtB, HL, Bizyg                      |
| Shodoshimo            | Hand, UL, LL, FtL, HL, HB                                                | ATL, Tail, BiL, UA, LA, Hand, UL, LL, FtL, HL, Bizyg                         |
| Takasakiyama          | Tail, BiL, Tho, UA, LA, UL, LL, FtL, Bizyg                               | Wt, ATL, Tail, BiL, Tho, UA, LA, UL, LL, FtL, FtB, HL, Bizyg                 |
| Koshima               | Wt, ATL, Biac, BiL, Tho, UA, LA, Hand, UL, LL, FtL, FtB, HL, HB, Bizyg   | Wt, ATL, Biac, BiL, Tho, UA, LA, UL, LL, FtL, FtB, HL, HB, Bizyg             |
| M.f. yakui            | Wt, ATL, Tail, Biac, Tho, UA, LA, Hand, UL, LL, FtL, FtB, HL, HB,        | Wt, ATL, Tail, Biac, BiL, Tho, UA, LA, Hand, UL, LL, FtL, FtB, HL, HB, Bizyg |
| <b>Takahama vs</b>    |                                                                          |                                                                              |
| Arashiyama            | FtBr                                                                     | None                                                                         |
| Wakasa                | LL                                                                       | None                                                                         |
| Nagatoro              | BiL                                                                      | BiL, Bizyg                                                                   |
| Awajishima            | Tail, LA, Hand, LL                                                       | Hand, UL, LL, FtL, HL, Bizyg                                                 |
| Shodoshimo            | Hand, FtL, FtBr, HL                                                      | UA, Hand, UL, LL, FtL, HL, Bizyg                                             |
| Takasakiyama          | None                                                                     | Tho, FtBr, HL, Bizyg                                                         |
| Koshima               | Wt, ATL, Tail, Biac, Tho, UA, LA, Hand, UL, LL, FtL, HL, Bizyg           | Wt, ATL, Biac, Tho, UL, HL, HB, Bizyg                                        |
| M.f. yakui            | ATL, Biac, UA, LA, Hand, UL, LL,                                         | ATL, Biac, Tho, UA, LA, Hand, UL, LL,                                        |

|                      |                                                                              |                                                                         |
|----------------------|------------------------------------------------------------------------------|-------------------------------------------------------------------------|
|                      | FtL                                                                          | FtL, FtB, HL, HB, Bizyg                                                 |
| <b>Arashiyama vs</b> |                                                                              |                                                                         |
| Wakasa               | LL                                                                           | Wt                                                                      |
| Nagatoro             | None                                                                         | BiL, LL, FtBr, Bizyg                                                    |
| Awajishima           | UA, LL, FtL, FtB, Bizyg                                                      | Wt, ATL, UA, LA, Hand, LL, FtL, FtBr, HL, Bizyg                         |
| Shodoshimo           | UA, Hand, LL, FtL, HL, Bizyg                                                 | Tho, UA, Hand, LL, FtL, HL, Bizyg                                       |
| Takasakiyama         | UA, LL, Bizyg                                                                | Wt, Biac, BiL, Tho, UA, Hand, LL, HL, Bizyg                             |
| Koshima              | Wt, ATL, Tail, Biac, BiL, Tho, UA, Hand, UL, LL, FtL, FtB, HL, HB, Bizyg     | Wt, ATL, Tail, Biac, BiL, Tho, UA, LA, Hand, LL, FtL, HL, HB, Bizyg     |
| M.f. yakui           | Wt, ATL, Biac, Tho, UA, Hand, UL, LL, FtL, FtB, HL, HB, Bizyg                | Wt, ATL, Tail, Biac, Tho, UA, LA, Hand, UL, LL, FtL, FtB, HL, HB, Bizyg |
| <b>Wakasa vs</b>     |                                                                              |                                                                         |
| Nagatoro             | Wt, LL                                                                       | BiL                                                                     |
| Awajishima           | None                                                                         | HL                                                                      |
| Shodoshimo           | FtL                                                                          | Hand, FtL                                                               |
| Takasakiyama         | None                                                                         | Wt, Tho                                                                 |
| Koshima              | Wt, ATL, Biac, Tho, UA, LA, FtBr, HL, HB                                     | Wt, Tho, HB                                                             |
| M.f. yakui           | ATL, Biac, UA, Hand, UL, FtL, FtBr, HB                                       | ATL, Biac, Tho, UA, Hand, LL, FtL, FtBr, HB                             |
| <b>Nagatoro vs</b>   |                                                                              |                                                                         |
| Awajishima           | Wt, Tail, BiL, Tho, UA, LA, Hand, UL, LL, FtL, HB, Bizyg                     | Wt, ATL, Tail, BiL, Hand, UL, FtL, HL                                   |
| Shodoshimo           | Wt, Tho, Hand, UL, LL, FtL, HL, HB                                           | Tho, UA, Hand, UL, LL, FtL, HL                                          |
| Takasakiyama         | Wt, BiL, Tho, UL, LL, FtL, HL, Bizyg                                         | Wt, BiL, Tho, Hand, FtL, FtB, HL, Bizyg                                 |
| Koshima              | Wt, ATL, Tail, Biac, BiL, Tho, UA, LA, Hand, UL, LL, FtL, FtB, HL, HB, Bizyg | Wt, ATL, Tail, Biac, BiL, Tho, Hand, UL, LL, FtL, HL, HB, Bizyg         |
| M.f. yakui           | Wt, ATL, Biac, BiL, Tho, UA, LA, Hand, UL, LL, FtL, FtB, HL, HB              | ATL, Biac, BiL, Tho, UA, LA, Hand, UL, LL, FtL, FtB, HL, HB, Bizyg      |

|                               |                                                                 |                                                               |
|-------------------------------|-----------------------------------------------------------------|---------------------------------------------------------------|
| <b>Awajishima vs</b>          |                                                                 |                                                               |
| Shodoshimo                    | Tail, BiL, FtL, FtB, HL                                         | Wt, Tail, Hand, FtL, HL                                       |
| Takasakiyama                  | Biac, HL                                                        | Tail, LA, UL, FtL, FtB, HL                                    |
| Koshima                       | Wt, ATL, Biac, BiL, Tho, Hand, UL, FtBr, HL, HB, Bizyg          | Biac, HL, HB                                                  |
| M.f. yakui                    | ATL, Tail, Biac, Hand, UL, FtL, FtB, HL, HB                     | ATL, Tail, Biac, UA, UL, FtL, FtB, HL, HB                     |
| <b>Shodoshimo vs</b>          |                                                                 |                                                               |
| Takasakiyama                  | BiL, FtL, HL                                                    | Wt, UA, Hand, UL, LL< FtL, HL                                 |
| Koshima                       | Wt, ATL, Tail, Biac, BiL, Tho, UA, LA, UL, LL, FtB, HB, Bizyg   | Wt, Tail, Biac, Tho, Hand, FtL, HB, Bizyg                     |
| M.f. yakui                    | ATL, Biac, UL, LL, FtBr, HB                                     | Biac, UA, UL, LL, FtBr, HB                                    |
| <b>Takasakiyama vs</b>        |                                                                 |                                                               |
| Koshima                       | ATL, Tail, Biac, BiL, Tho, UA, Hand, UL, LL, FtB, HL, HB, Bizyg | Wt, ATL, Tail, Biac, BiL, Tho, LA, UL, LL, FtB, HL, HB, Bizyg |
| M.f. yakui                    | ATL, Hand, UL, LL, FtL, FtBr, HB                                | ATL, Biac, BiL, UA, LA, Hand, UL, LL, FtL, FtB, HL, HB,       |
| <b>Koshimo vs. M.f. yakui</b> | Wt, Tail, Biac, BiL, Tho, UL, FtL, HL, Bizyg                    | Wt, Tail, BiL, Tho, UA, LA, Hand, UL, LL, FtL, FtBr           |

**Table 11. Cayo Santiago Macaque Sample, *Macaca mulatta*.** Sexual dimorphism values (male/female) and means by sex. Weight in kg, all other measurements in cm.

|                          | Indian Skeletal | Cayo Santiago Skeletal | Cayo Santiago Somatometric | Indian Somatic (Hamada, 2008) |
|--------------------------|-----------------|------------------------|----------------------------|-------------------------------|
| Resource Base            |                 |                        |                            |                               |
| Weight                   |                 |                        |                            |                               |
| Sex Dimorphism           | NA              | NA                     | 1.21                       | 1.24                          |
| Male mean                |                 |                        | 11                         | 9.8                           |
| Female mean              |                 |                        | 9.1                        | 7.9                           |
| Upper Arm Length/Humerus |                 |                        |                            |                               |
| Sex Dimorphism           | --              | 1.13                   | 1.13                       | 1.12                          |
| Male mean                | --              | 161.5                  | 167.1                      | 156.9                         |
| Female mean              | --              | 142.4                  | 148.3                      | 140                           |
| Mixed Sex mean           | 149.3           | 151.9                  | --                         | --                            |
| Thigh Length/Fem L       |                 |                        |                            |                               |
| Sex Dimorphism           | --              | 1.15                   | 1.16                       | 1.14                          |
| Male mean                | --              | 187.3                  | 215                        | 188.8                         |
| Female mean              | --              | 162.9                  | 184.5                      | 165.1                         |
| Mixed Sex mean           | 173             | 175                    | --                         | --                            |
| Leg Length/Tibia L       |                 |                        |                            |                               |
| Sex Dimorphism           | --              | 1.14                   | 1.14                       | 1.10                          |
| Male mean                | --              | 176.8                  | 175.5                      | 167.1                         |
| Female mean              | --              | 155                    | 153.8                      | 151.6                         |
| Mixed Sex mean           | 161.5           | 165.8                  | --                         | --                            |



**Table 12. *Homo erectus* paleodemes.** Cranial capacity in cc (already noted), Stature in cm, Weight in kg, all other measurements in mm.

|                       | Ngandong,<br>Indonesia | Dmanisi,<br>Georgia | Zhoukoudian,<br>China | Koobi Fora,<br>Kenya | Sangiran,<br>Indonesia | Trinil,<br>Indonesia | Daka,<br>Ethiopia |
|-----------------------|------------------------|---------------------|-----------------------|----------------------|------------------------|----------------------|-------------------|
| Time span             | Catastrophic           | ~10,000 years       | ~120,000 years        | ~130,000 years       | ~500,000 years         | ?                    | ?                 |
| Cranial Capacity (cc) |                        |                     |                       |                      |                        |                      |                   |
| Mean                  | 1132                   | 641.75              | 1043                  | 781                  | 907.67                 | --                   | --                |
| N                     | 6                      | 4                   | 5                     | 3                    | 6                      |                      |                   |
| Stature               |                        |                     |                       |                      |                        |                      |                   |
| Mean                  | --                     | --                  | 147.5                 | 171                  | --                     | --                   | --                |
| N                     |                        |                     | 2                     | 3                    |                        |                      |                   |
| Glabello Occipital L  |                        |                     |                       |                      |                        |                      |                   |
| Mean                  | 202.83                 | 168                 | 193.8                 | 172.67               | 192.5                  | --                   | --                |
| N                     | 6                      | 4                   | 5                     | 3                    | 4                      |                      |                   |
| Bizygomatic Br        |                        |                     |                       |                      |                        |                      |                   |
| Mean                  | --                     | 137.33              | --                    | 144                  | --                     | --                   | --                |
| N                     |                        | 3                   |                       | 2                    |                        |                      |                   |
| Biorbital Br          |                        |                     |                       |                      |                        |                      |                   |
| Mean                  | --                     | 98.25               | --                    | 109.5                | 107                    | --                   | --                |
| N                     |                        | 4                   |                       | 2                    | 2                      |                      |                   |
| Na-Pr                 |                        |                     |                       |                      |                        |                      |                   |
| Mean                  | --                     | 74.5                | --                    | --                   | --                     | --                   | --                |
| N                     |                        | 2                   |                       |                      |                        |                      |                   |
| Na-Ba                 |                        |                     |                       |                      |                        |                      |                   |
| Mean                  | 112.5                  | 97                  | 105.5                 | 102                  | 115                    | --                   | --                |
| N                     | 2                      | 2                   | 1                     | 2                    | 1                      |                      |                   |
| BA-Br (ht)            |                        |                     |                       |                      |                        |                      |                   |
| Mean                  | 124.4                  | 99                  | 115                   | 100.67               | 114                    | --                   | --                |
| N                     | 5                      | 3                   | 1                     | 3                    | 1                      |                      |                   |
| Bipor                 |                        |                     |                       |                      |                        |                      |                   |

|                        |           |                                 |                                                                                      |                                              |                                                                          |                                                                                   |                           |                       |
|------------------------|-----------|---------------------------------|--------------------------------------------------------------------------------------|----------------------------------------------|--------------------------------------------------------------------------|-----------------------------------------------------------------------------------|---------------------------|-----------------------|
|                        | Mean<br>N | --                              | --                                                                                   | 123.65<br>4                                  | 110<br>3                                                                 | 124<br>3                                                                          | --                        | --                    |
| Biraaur                |           |                                 |                                                                                      |                                              |                                                                          |                                                                                   |                           |                       |
|                        | Mean<br>N | 132.33<br>6                     | --                                                                                   | 145.5<br>4                                   | 123.67<br>3                                                              | 137<br>5                                                                          | --                        | --                    |
| Supraorbital thickness |           |                                 |                                                                                      |                                              |                                                                          |                                                                                   |                           |                       |
|                        | Mean<br>N | 15.08<br>5                      | 10.86<br>4                                                                           | 13.7<br>5                                    | 9.6<br>5                                                                 | 14.36<br>5                                                                        | --                        | --                    |
| Mandible Corpus ht/br  |           |                                 |                                                                                      |                                              |                                                                          |                                                                                   |                           |                       |
|                        | Mean<br>N | --                              | --                                                                                   | --                                           | 30.33/19.33<br>3                                                         | 35.43/19.45<br>7                                                                  | --                        | --                    |
| Symphysis ht/wdth      |           |                                 |                                                                                      |                                              |                                                                          |                                                                                   |                           |                       |
|                        |           | --                              | --                                                                                   | --                                           | 34.75/19.57<br>2/3                                                       | 36.68/19.16<br>5                                                                  | --                        | --                    |
| Femur length           |           |                                 |                                                                                      |                                              |                                                                          |                                                                                   |                           |                       |
|                        | Mean<br>N | --                              | --                                                                                   | 395.5<br>2                                   | 473.33<br>3                                                              | --                                                                                | 435.67<br>3               | --                    |
| Subtrochant AP/ML      |           |                                 |                                                                                      |                                              |                                                                          |                                                                                   |                           |                       |
|                        | Mean<br>N | --                              | --                                                                                   | 22.95/34.3<br>2                              | 26.53/33.83<br>3                                                         | --                                                                                | 26.04/32.7<br>1           | 26.9/38.2<br>2        |
| Naledi Weight          |           |                                 |                                                                                      |                                              |                                                                          |                                                                                   |                           |                       |
|                        | Mean<br>N | --                              | --                                                                                   | 61.09<br>2                                   | 68.61<br>3                                                               | --                                                                                | 64.95<br>1                | 75.46<br>2            |
| Other Weight           |           |                                 |                                                                                      |                                              |                                                                          |                                                                                   |                           |                       |
|                        | Mean<br>N | --                              | 46.95<br>4                                                                           | --                                           | 57.67<br>4                                                               | --                                                                                | --                        | --                    |
|                        | Specimens | Ngandong 1, 6,<br>7, 10, 11, 12 | D2280,<br>2282/211,<br>2600/4500,<br>3442/4111,<br>3444/3900,<br>3901, 4167,<br>4501 | ZHK II, III, X,<br>XI, XII, Fem I,<br>Fem IV | KNM-ER 730,<br>731, 736, 737,<br>803, 992, 1808,<br>3733, 3883,<br>42700 | Sangiran 1b, 2,<br>5, 6, 8, 9, 10,<br>12, 17, 21, 22,<br>38, Bukuran,<br>Skull IX | Trinil Fem II,<br>III, IV | BOU-VP-1/75,<br>19/63 |

**Table 13. *Homo neanderthalensis* and *other Homo*.** Cranial capacity in cc (already noted), Stature in cm, Weight in kg, all other measurements in mm.

|                       | Shanidar,<br>Iraq    | Krapina,<br>Croatia | El Sidrón,<br>Spain | European       | Near Eastern   | Atapuerca,<br>Spain | Dinaledi,<br>South Africa |
|-----------------------|----------------------|---------------------|---------------------|----------------|----------------|---------------------|---------------------------|
| Time Span             | ~30-60,000<br>years? | ?                   | Single event?       | ~40,000 years? | ~70,000 years? | Catastrophic?       | ?                         |
| Cranial Capacity (cc) |                      |                     |                     |                |                |                     |                           |
| Mean                  | --                   | --                  | --                  | 1449.29        | 1505.5         | 1245                | --                        |
| N                     |                      |                     |                     | 7              | 2              | 3                   |                           |
| Stature               |                      |                     |                     |                |                |                     |                           |
| Mean                  | 158.14               | --                  | --                  | 162.54         | 167.47         | --                  | --                        |
| N                     | 5                    |                     |                     | 10             | 3              |                     |                           |
| Glabello Occipital L  |                      |                     |                     |                |                |                     |                           |
| Mean                  | --                   | --                  | --                  | 201.69         | 199            | 190.67              | --                        |
| N                     |                      |                     |                     | 8              | 2              | 3                   |                           |
| Bizygomatic Br        |                      |                     |                     |                |                |                     |                           |
| Mean                  | 150                  | --                  | --                  | --             | 139.5          | --                  | --                        |
| N                     | 3                    |                     |                     |                | 2              |                     |                           |
| Biorbital Br          |                      |                     |                     |                |                |                     |                           |
| Mean                  | 117.95               | --                  | --                  | --             | --             | 110.17              | --                        |
| N                     | 4                    |                     |                     |                |                | 3                   |                           |
| Bigonial              |                      |                     |                     |                |                |                     |                           |
| Mean                  | --                   | --                  | --                  | 109.4          | 96             | --                  | --                        |
| N                     |                      |                     |                     | 5              | 2              |                     |                           |
| Na-Pr                 |                      |                     |                     |                |                |                     |                           |
| Mean                  | --                   | --                  | --                  | --             | 84             | 76.05               | --                        |
| N                     |                      |                     |                     |                | 2              | 2                   |                           |
| Na-Ba                 |                      |                     |                     |                |                |                     |                           |
| Mean                  | --                   | --                  | --                  | --             | --             | 107.2               | --                        |
| N                     |                      |                     |                     |                |                | 3                   |                           |
| BA-Br (ht)            |                      |                     |                     |                |                |                     |                           |
| Mean                  | --                   | --                  | --                  | 127.63         | 127            | --                  | --                        |
| N                     |                      |                     |                     | 4              | 2              |                     |                           |

|                    |                       |                                            |                         |                                               |                                     |                                             |                                        |
|--------------------|-----------------------|--------------------------------------------|-------------------------|-----------------------------------------------|-------------------------------------|---------------------------------------------|----------------------------------------|
| Biraucicular       |                       |                                            |                         |                                               |                                     |                                             |                                        |
| Mean               | --                    | --                                         | --                      | 131.25                                        | 147.5                               | 138.83                                      | --                                     |
| N                  |                       |                                            |                         | 4                                             | 2                                   | 3                                           |                                        |
| Mandible Corpus ht |                       |                                            |                         |                                               |                                     |                                             |                                        |
| Mean               | --                    | 31.38                                      | 33.9                    | 33.5                                          | --                                  | --                                          | --                                     |
| N                  |                       | 4                                          | 3                       | 6                                             |                                     |                                             |                                        |
| Mandible Corpus br |                       |                                            |                         |                                               |                                     |                                             |                                        |
| Mean               | --                    | 14.75                                      | 17.8                    | 15.5                                          | --                                  | --                                          | --                                     |
| N                  |                       | 4                                          | 3                       | 6                                             |                                     |                                             |                                        |
| Mandible Length    |                       |                                            |                         |                                               |                                     |                                             |                                        |
| Mean               | --                    | --                                         | 112                     | 120.25                                        | --                                  | --                                          | --                                     |
| N                  |                       |                                            | 2                       | 4                                             |                                     |                                             |                                        |
| Tibia Length       |                       |                                            |                         |                                               |                                     |                                             |                                        |
| Mean               | 340.63                | --                                         | --                      | 338                                           | --                                  | 356                                         | --                                     |
| N                  | 4                     |                                            |                         | 4                                             |                                     | 7                                           |                                        |
| Humerus Length     |                       |                                            |                         |                                               |                                     |                                             |                                        |
| Mean               | 305.67                | --                                         | --                      | 312.2                                         | --                                  | 334                                         | --                                     |
| N                  | 3                     |                                            |                         | 5                                             |                                     | 3                                           |                                        |
| Femur length       |                       |                                            |                         |                                               |                                     |                                             |                                        |
| Mean               | 431                   | --                                         | --                      | 430.75                                        | --                                  | 452.67                                      | --                                     |
| N                  | 4                     |                                            |                         | 6                                             |                                     | 3                                           |                                        |
| Subtrochant AP/ML  |                       |                                            |                         |                                               |                                     |                                             |                                        |
| Mean               | 28.07/34.1            | --                                         | --                      | 26.52/34.82                                   | 26/33.17                            | --                                          | 19.06/26.26                            |
| N                  | 3                     |                                            |                         | 5                                             | 3                                   |                                             | 8                                      |
| Fem AP/SI          |                       |                                            |                         |                                               |                                     |                                             |                                        |
| Mean               | 48.35                 | --                                         | --                      | 51/51.74                                      | --/47                               | --                                          | --                                     |
| N                  | 2                     |                                            |                         | 5                                             | 2                                   |                                             |                                        |
| Naledi Weight      |                       |                                            |                         |                                               |                                     |                                             |                                        |
| Mean               | 71.68                 | --                                         | --                      | 68.71                                         | 66.09                               | --                                          | 44.06                                  |
| N                  | 3                     |                                            |                         | 4                                             | 3                                   |                                             | 8                                      |
| Specimens          | Shan 1, 2, 3, 4, 5, 6 | Krapina D, H, I, J, G213, G214, G, 209/212 | Sidron mandible 1, 2, 3 | Neandertal, La Ferrassie 1, 2, La Quina 5, 9, | Amud1, Tabun C1, Tabun Ea, Kebara 2 | At-1, 2, 250, 300, 505, 605, 607, 848, 888, | UW 101-002, 003, 018, 226, 1136, 1391, |

|  |  |  |  |                                                                                    |  |                                                                                                                                     |            |
|--|--|--|--|------------------------------------------------------------------------------------|--|-------------------------------------------------------------------------------------------------------------------------------------|------------|
|  |  |  |  | Regourdou,<br>Fond de Foret,<br>St. Cesaire, Spy<br>1, 2, Gibraltar,<br>Guattari 1 |  | 950,<br>1100/1111/1197<br>/1198, 1957, Cr.<br>4, 5, 6, Femur<br>X, XII, XIII,<br>Tibia I, III, IV,<br>VI, XI, XII,<br>Hum II, X, XV | 1475, 1482 |
|--|--|--|--|------------------------------------------------------------------------------------|--|-------------------------------------------------------------------------------------------------------------------------------------|------------|

**Table 14. Fossil Significant Intraspecific Differences by Sex Across Paleodemes.** Numbers and types of variables differ across samples. See summary data tables for specifics. Variable abbreviations are: GOL = Glabella Occipital Length; Cap = Capacity, Biaur = Biauricular breadth.

| <b>Intraspecific Comparisons</b> |          |                                 |      |
|----------------------------------|----------|---------------------------------|------|
| <i>H. erectus</i>                |          | <b>Neandertals</b>              |      |
| <i>Cranial paleodemes</i>        |          | <i>Cranial paleodemes</i>       |      |
| Dmanisi vs Ngandong              | GOL, Cap | European vs Near Eastern        | None |
| Zhoukoudian                      | GOL, Cap | Shanidar                        | None |
| Koobi Fora                       | None     | Krapina                         | None |
| Sangiran                         | None     | El Sidrón                       | None |
|                                  |          | Sima de los Huesos              | None |
| Ngandong vs. Zhoukoudian         | Biaur    |                                 |      |
| Koobi Fora                       | Cap      | Near Eastern vs. Shanidar       | None |
| Sangiran                         | None     | El Sidrón                       | None |
|                                  |          | Sima de los Huesos              | None |
| Zoukoudian vs Koobi Fora         | None     |                                 |      |
| Sangiran                         | None     | Shanidar vs. El Sidrón          | None |
|                                  |          | Sima de los Huesos              | None |
| Koobi Fora vs. Sangiran          | None     |                                 |      |
|                                  |          | El Sidrón vs Sima de los Huesos | None |
|                                  |          |                                 |      |
| <i>Postcranial paleodemes</i>    |          | <i>Postcranial paleodemes</i>   |      |
| Zhoukoudian vs. Koobi Fora       | None     | European vs Near Eastern        | None |
| Trinil                           | None     | Shanidar                        | None |
| Daka                             | None     | Sima de los Huesos              | None |
|                                  |          |                                 |      |
| Koobi Fora vs Trinil             | None     | Near Eastern vs. Shanidar       | None |
| Daka                             | None     | Sima de los Huesos              | None |
|                                  |          |                                 |      |
| Trinil vs Daka                   | NA       | Shanidar vs. Sima de los Huesos | None |

**Table 15. Fossil Significant Intraspecific Differences by Sex Across Paleodemes.** Numbers and types of variables differ across samples. See summary data tables for specifics. Variable abbreviations are: GOL = Glabella Occipital Length; Cap = Capacity, Biaur = Biauricular breadth, M1Br = Corpus breadth at M1, FebSubAP = Subtrochanteric AP, FemSubML = Subtrochanteric br ML.

| <b>Interspecific Comparisons</b>       |                       |                                        |                        |
|----------------------------------------|-----------------------|----------------------------------------|------------------------|
| <i>Cranial paleodemes</i>              |                       | <i>Postcranial paleodemes</i>          |                        |
| <i>H.e.</i> Dmanisi vs NE European     | GOL, BaBr, Cap, Biorb | <i>H.e.</i> Zhoukoudian vs NE European | None                   |
| NE Near Eastern                        | None                  | NE Near Eastern                        | None                   |
| NE Shanidar                            | None                  | NE Shanidar                            | None                   |
| Sima de los Huesos                     | Cap                   | Sima de los Huesos                     | None                   |
|                                        |                       | <i>H. naledi</i>                       | Wt, FemSubAP, FemsubML |
| <i>H.e.</i> Ngandong vs NE European    | Cap                   |                                        |                        |
| NE Near Eastern                        | None                  | <i>H.e.</i> Koobi Fora vs NE European  | None                   |
| Sima de los Huesos                     | None                  | NE Near Eastern                        | None                   |
|                                        |                       | NE Shanidar                            | None                   |
| <i>H.e.</i> Zhoukoudian vs NE European | Cap                   | Sima de los Huesos                     | None                   |
| NE Near Eastern                        | None                  | <i>H. naledi</i>                       | FemSubML               |
| Sima de los Huesos                     | None                  |                                        |                        |
|                                        |                       | <i>H.e.</i> Trinil vs NE European      | None                   |
| <i>H.e.</i> Koobi Fora vs NE European  | M1Br, Cap             | NE Shanidar                            | None                   |
| NE Near Eastern                        | None                  | Sima de los Huesos                     | None                   |
| NE Shanidar                            | None                  |                                        |                        |
| NE Krapina                             | None                  | <i>H.e.</i> Daka vs NE European        | None                   |
| NE El Sidrón                           | None                  | NE Near Eastern                        | None                   |
| Sima de los Huesos                     | None                  | NE Shanidar                            | None                   |
|                                        |                       | <i>H. naledi</i>                       | FemSubAP               |
| <i>H.e.</i> Sangiran vs NE European    | M1Br, Cap             |                                        |                        |
| NE Near Eastern                        | None                  | <i>H. naledi</i> vs NE European        | FemSubAPML             |
| NE Shanidar                            | None                  | NE Near Eastern                        | None                   |
| NE Krapina                             | None                  | NE Shanidar                            | None                   |
| NE El Sidrón                           | None                  |                                        |                        |
| Sima de los Huesos                     | None                  |                                        |                        |
